# Supplementary material for: Verification of simulated sea-ice concentrations from sea-ice/ocean models using satellite data
Source: MDPI journal article supplement (doi:10.3390/molecules27248898), 2010-05-01
Supplement: s1 [file s1]

# Chemical Composition and Antioxidant and Antibacterial Potencies of the *Artemisia ordosica* Aerial Parts Essential Oil during the Vegetative Period

Jize Zhang, Qiang Pan, Xiaoqing Zhang\* and Tana

## Supplementary Material

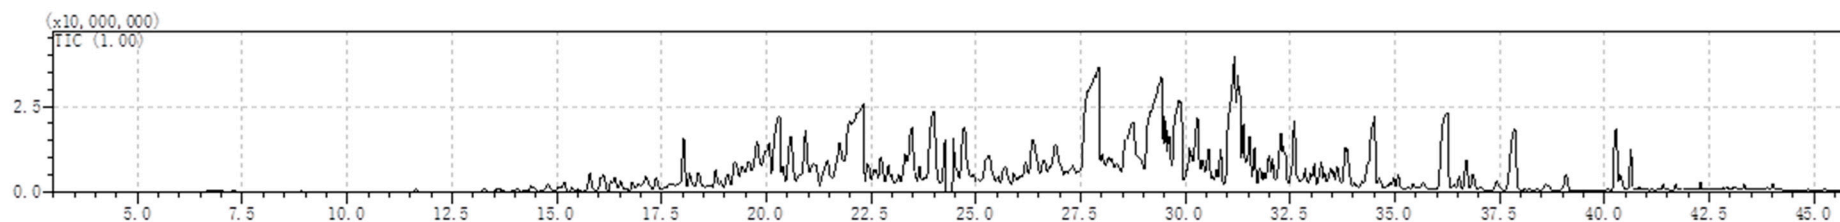

**Figure S1.** The GC-MS chromatogram of the vegetative-stage essential oil of *A. ordosica*.
